# Supplementary material for: ERK hyperactivation in epidermal keratinocytes impairs intercellular adhesion and drives Grover disease pathology
Source: JCI journal article supplement (doi:10.1172/jci.insight.182983), 2024-09-26

Figure 1A: pERK  
Rabbit anti-phospho-ERK1/2 (D13.14.4E)  
Cell Signaling #4370

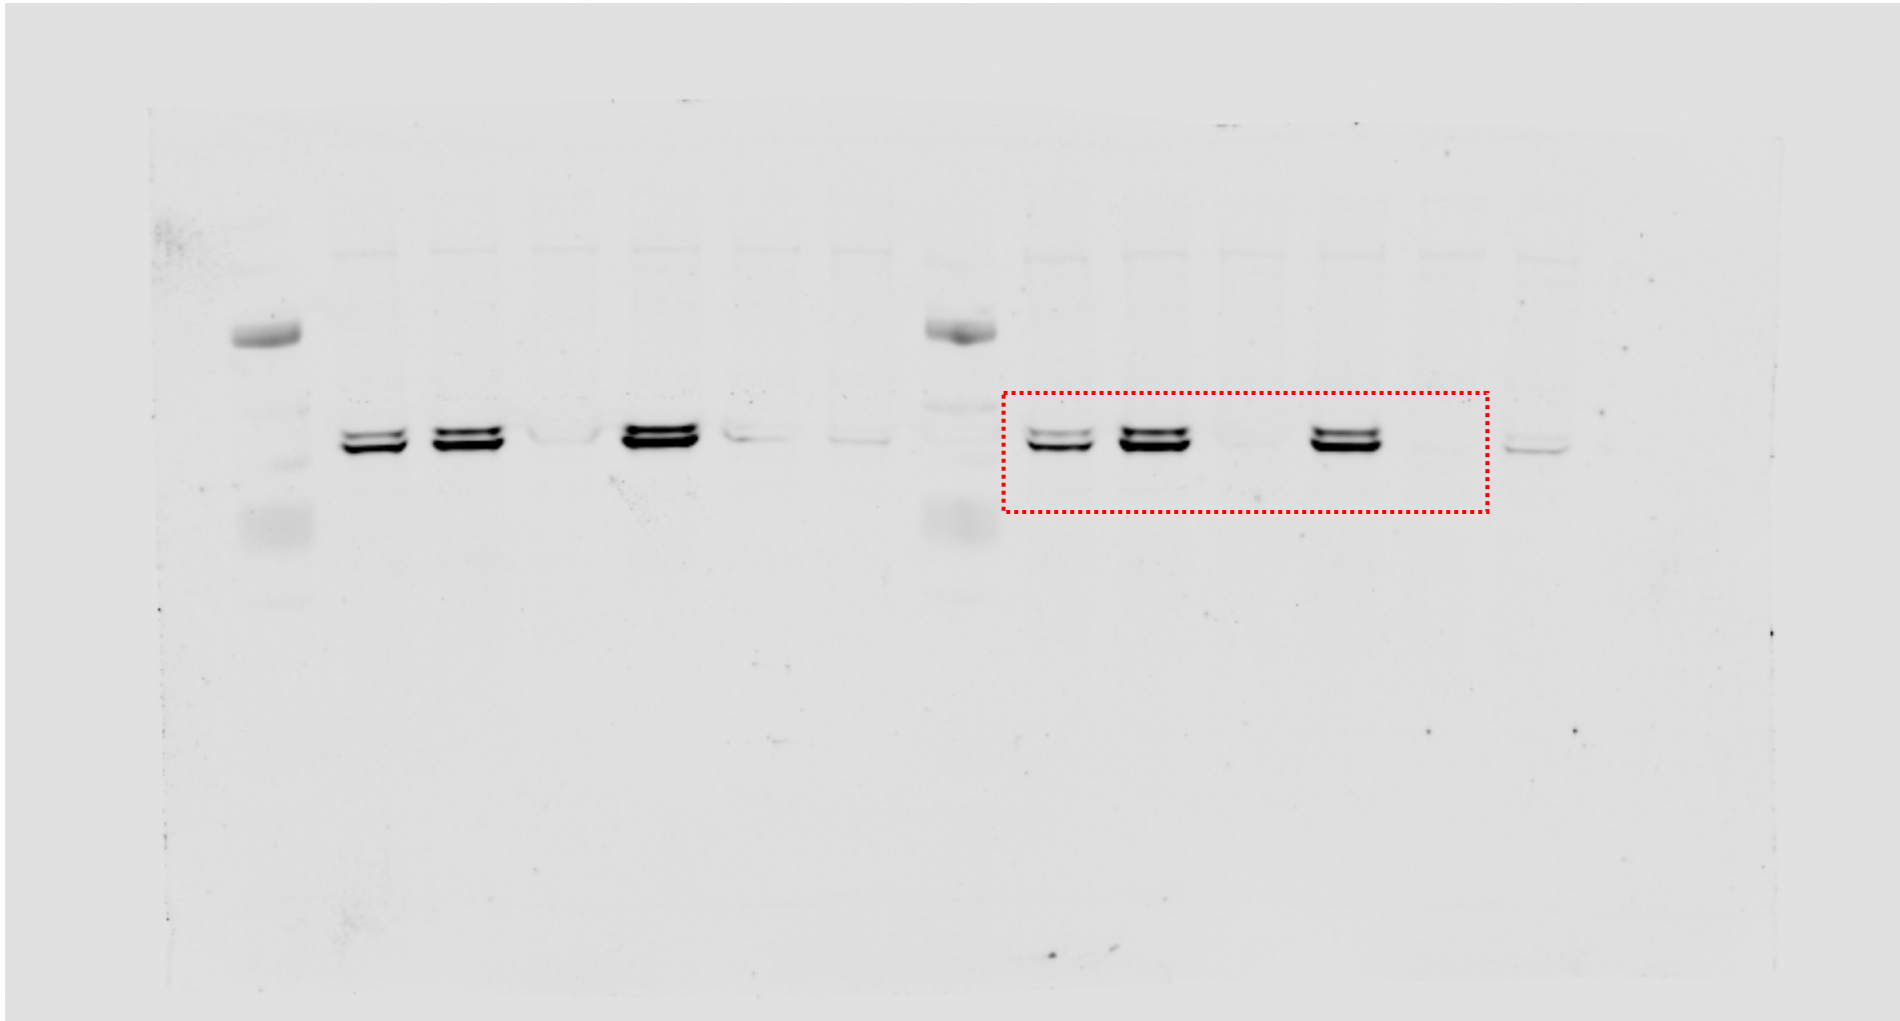

Figure 1A: ERK  
Mouse anti-ERK1/2 (L34F12)  
Cell Signaling #4696

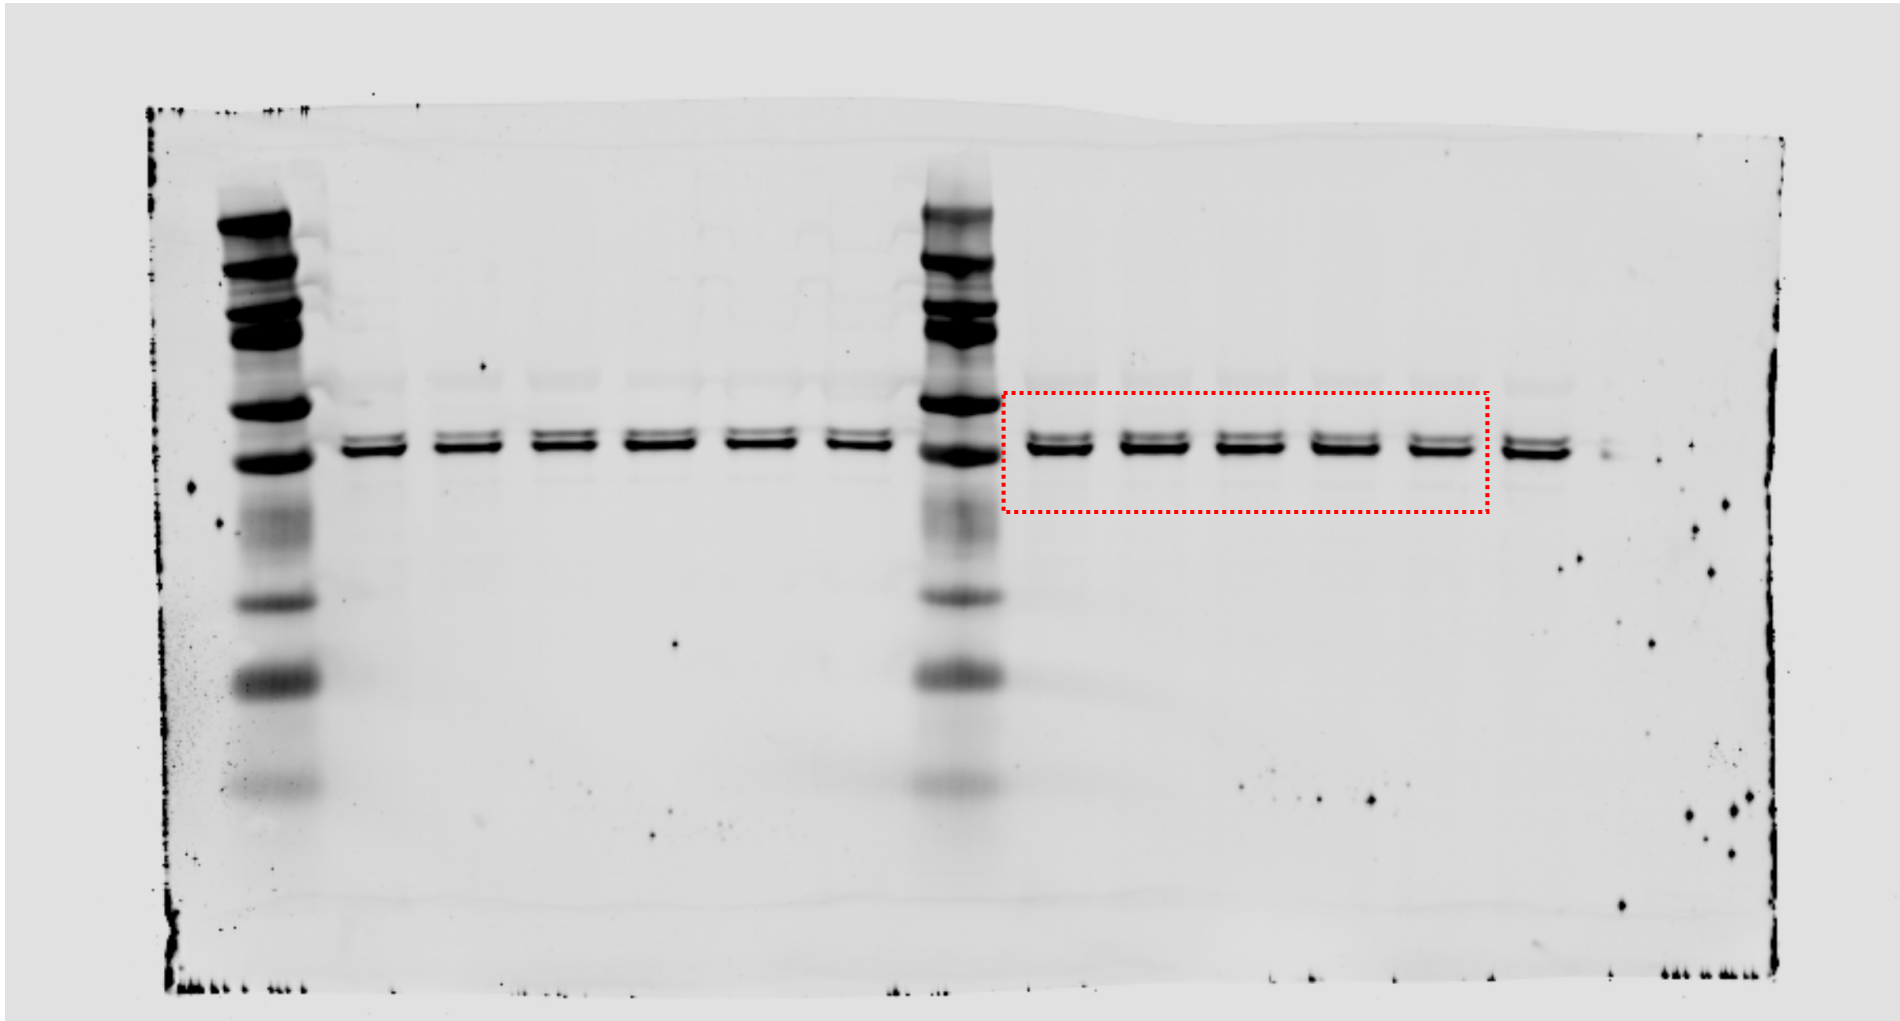

Figure 1A: **GAPDH** (re-probe of ERK blot)  
Mouse anti-GAPDH  
Santa Cruz #sc-47724

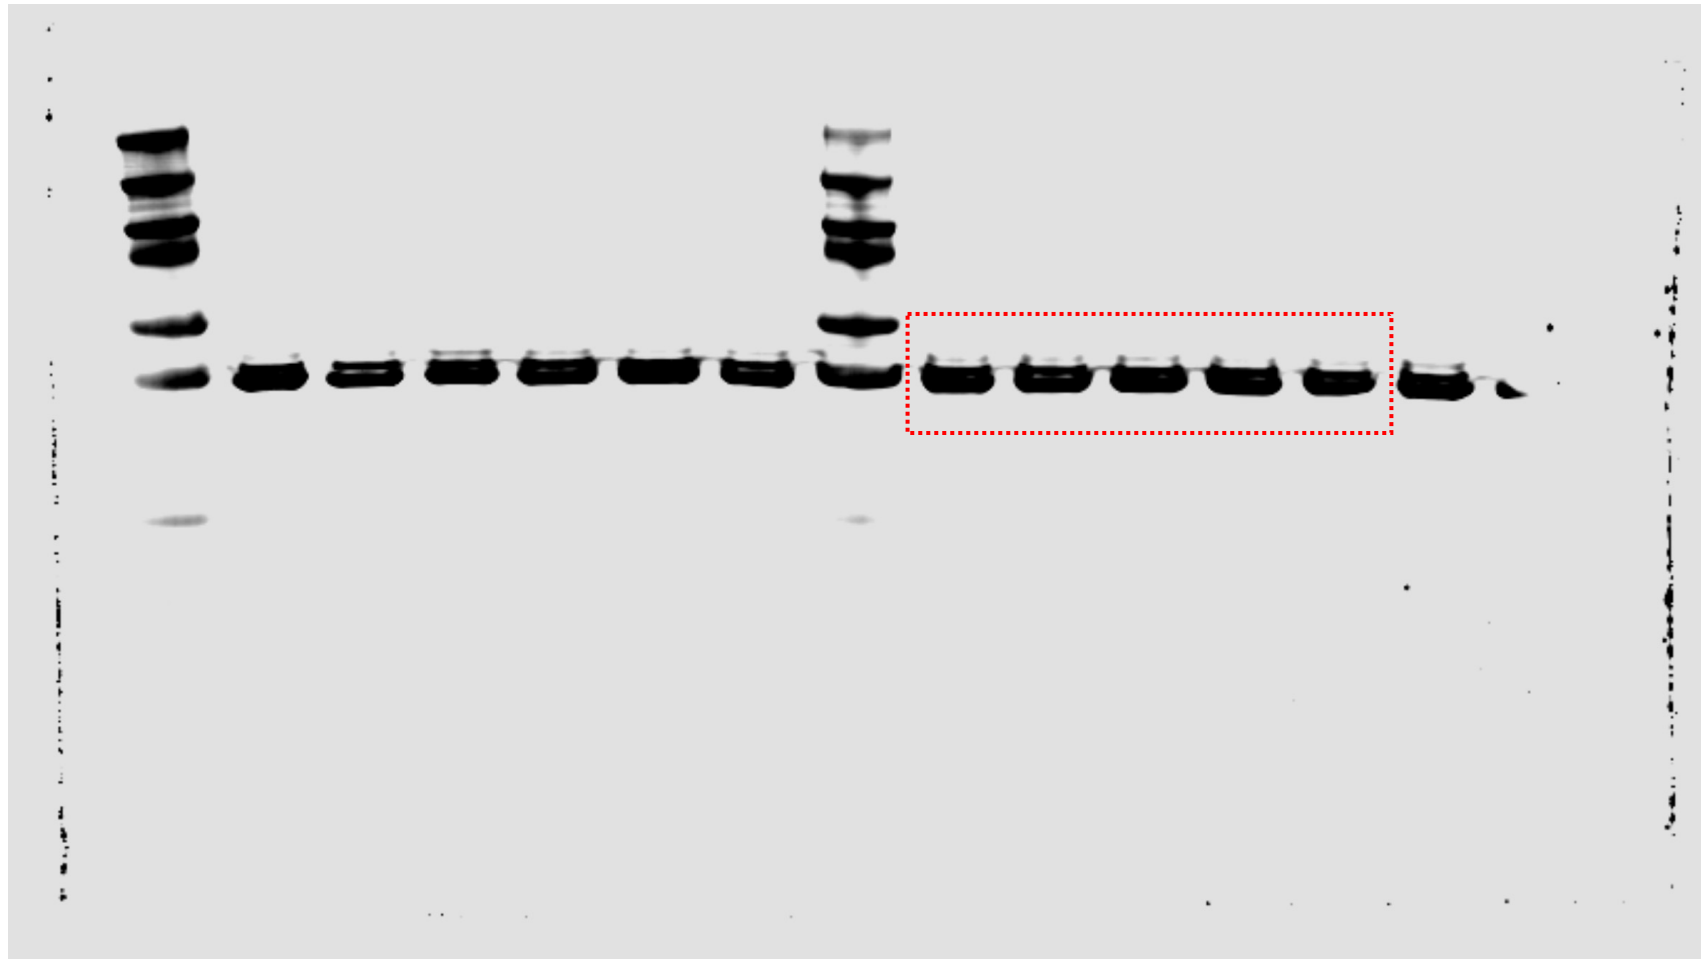

Figure 2A: Pan-Cadherin  
Rabbit anti-Pan-Cadherin  
Cell Signaling #4068

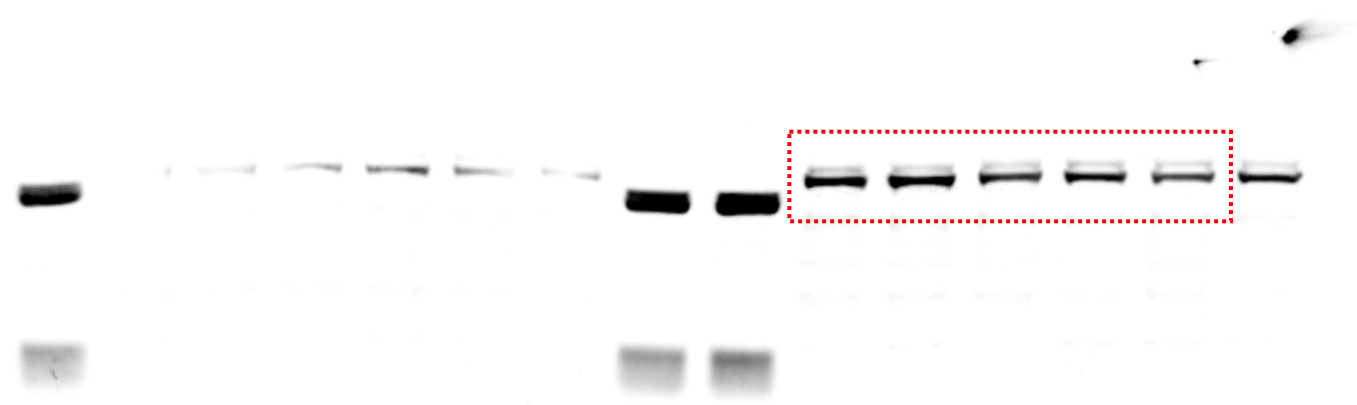

Figure 2A: **DSG1**  
Mouse anti-Desmoglein 1  
Santa Cruz #sc-137164

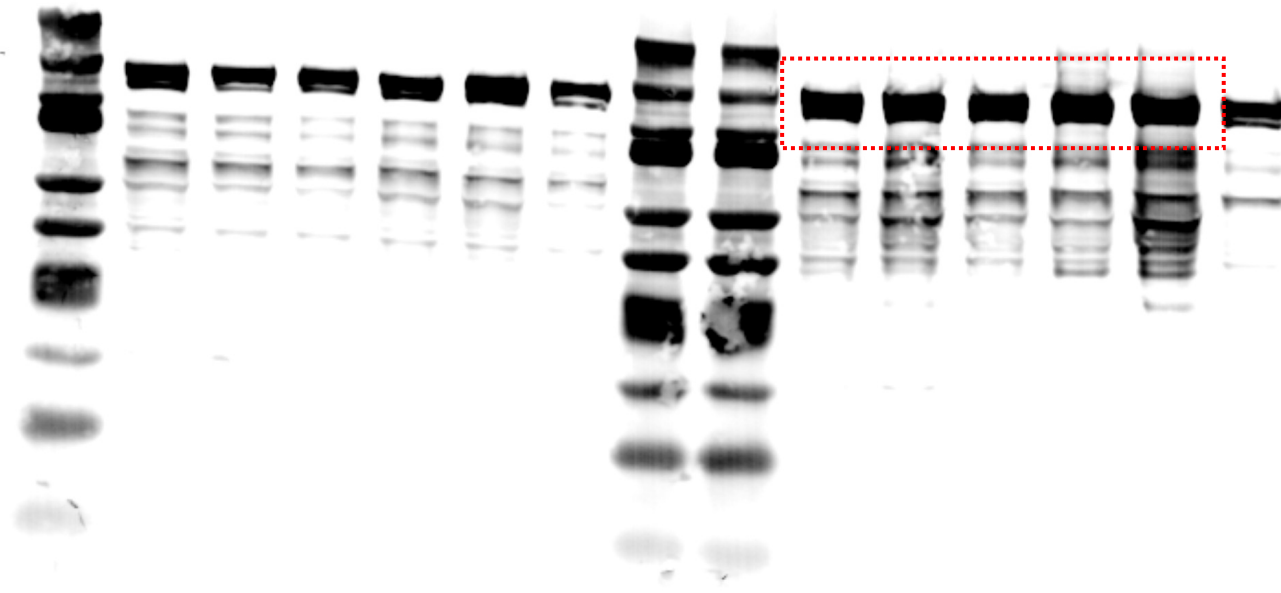

Figure 2A: **DSG2**  
Mouse anti-Desmoglein 2  
Santa Cruz #sc-80663

Figure 2A:  **$\beta$ -Actin**  
Mouse anti-beta-Actin  
Santa Cruz #sc- 47778

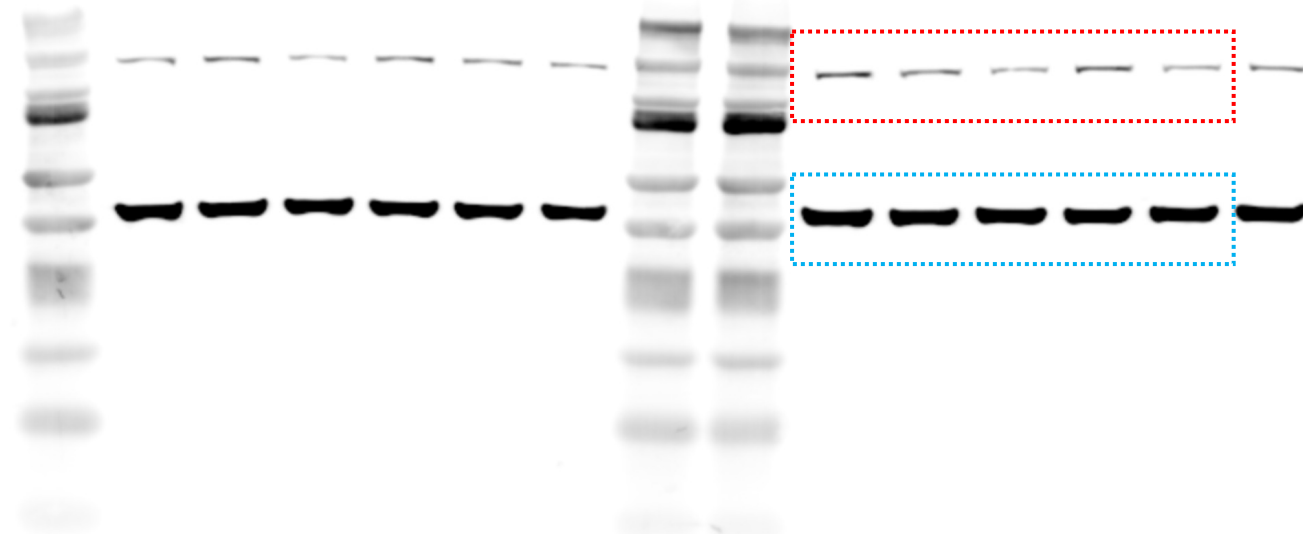

Figure 2A: **DSG3**  
Mouse anti-Desmoglein 3  
Santa Cruz #sc-53487

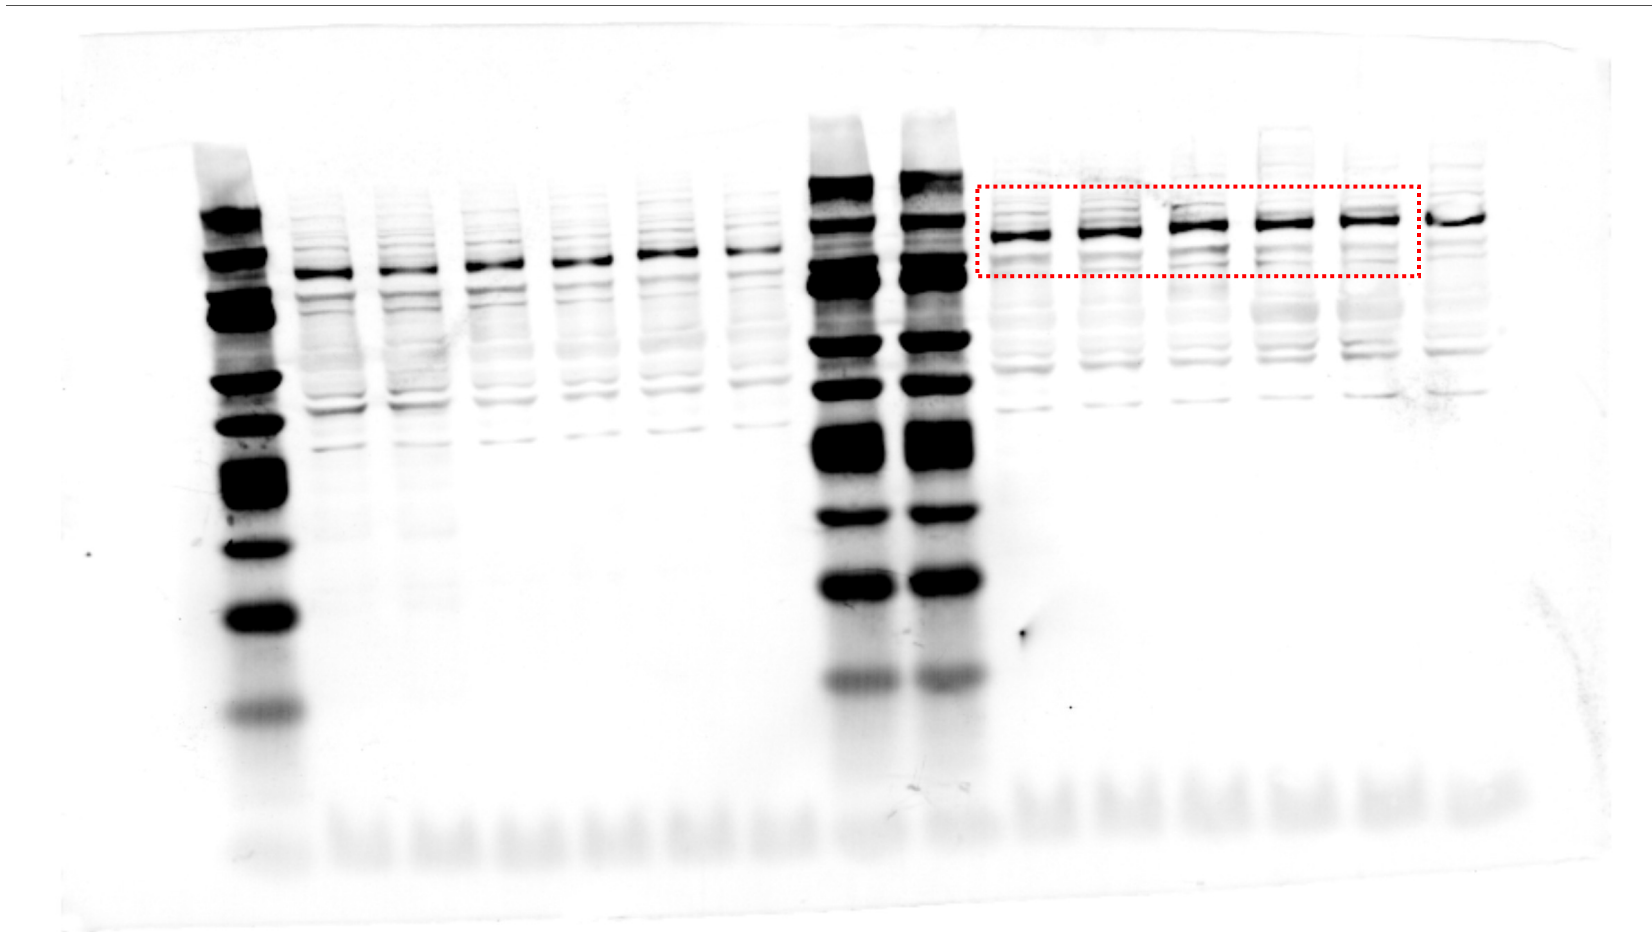

Figure 2A: **Plakoglobin**  
Mouse anti-Gamma-catenin (plakoglobin)  
Santa Cruz #sc-514115

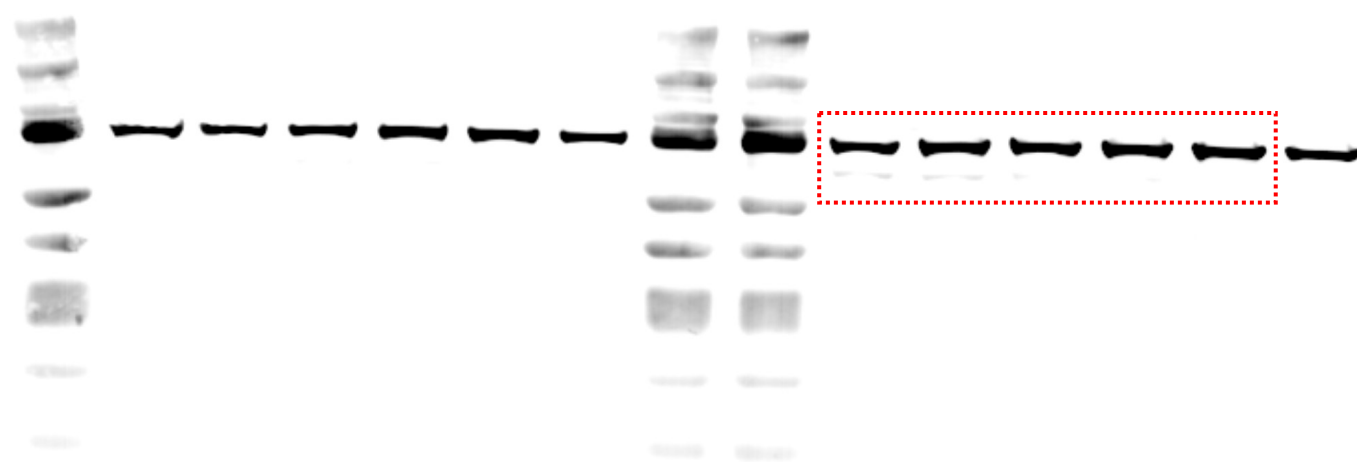



Supp Figure S1B: pERK  
Rabbit anti-phospho-ERK1/2 (D13.14.4E)  
Cell Signaling #4370

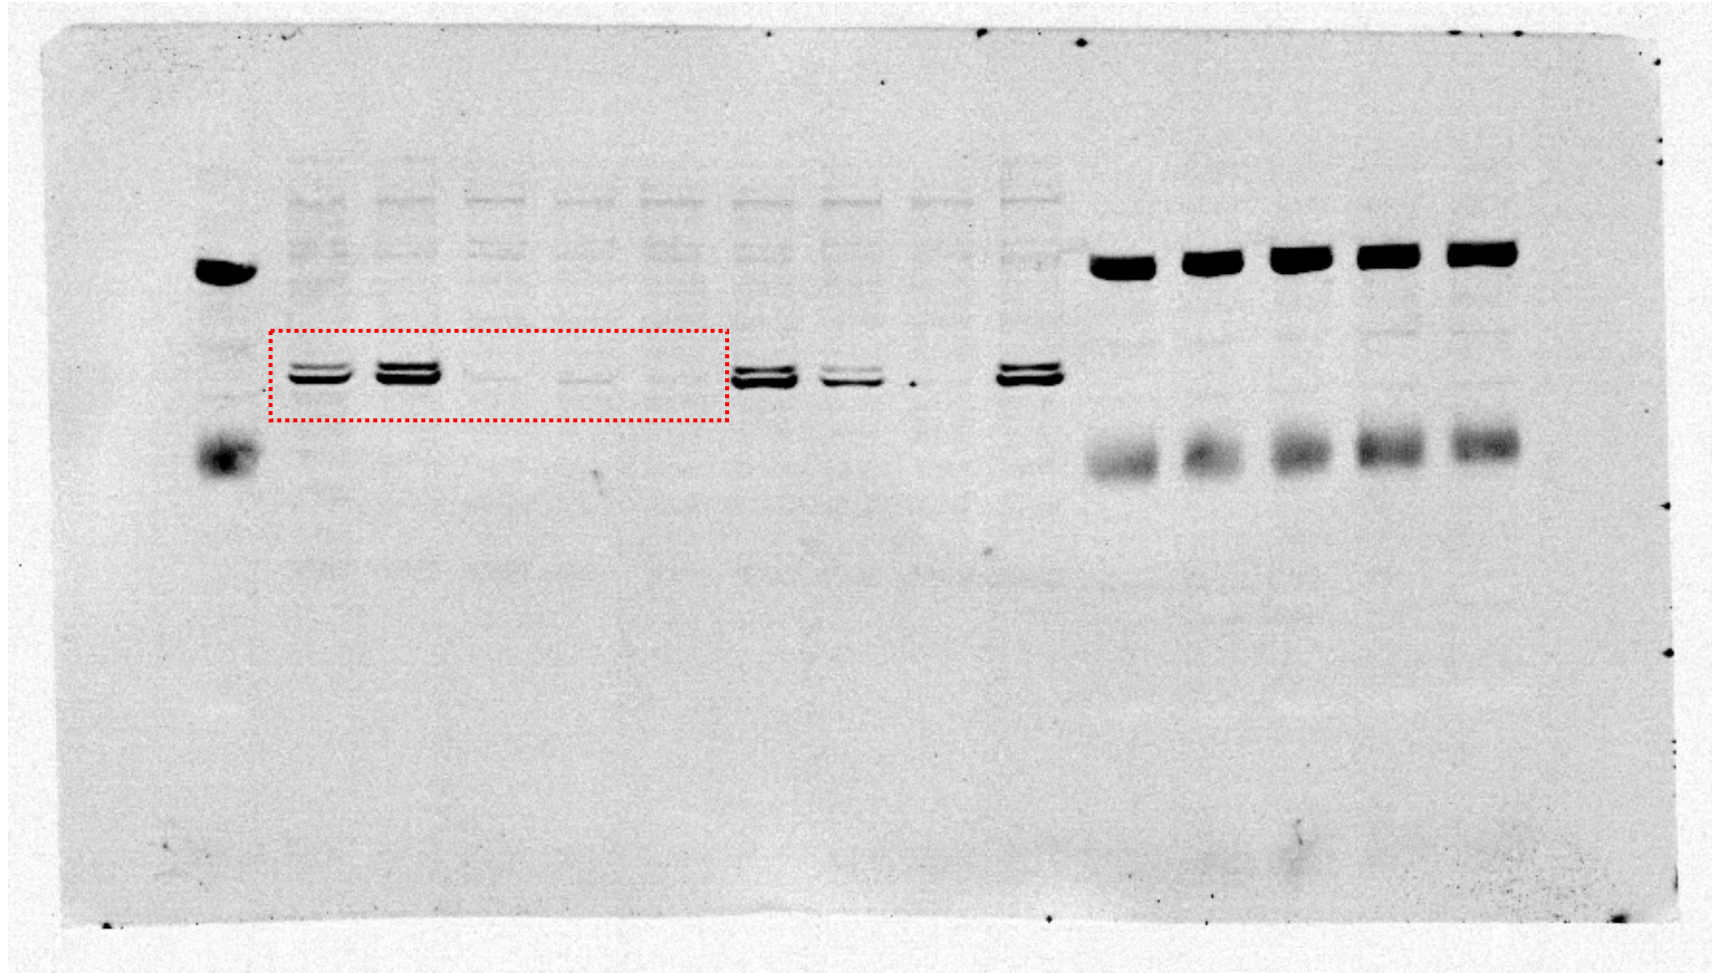

Supp Figure S1B: ERK  
Mouse anti-ERK1/2 (L34F12)  
Cell Signaling #4696

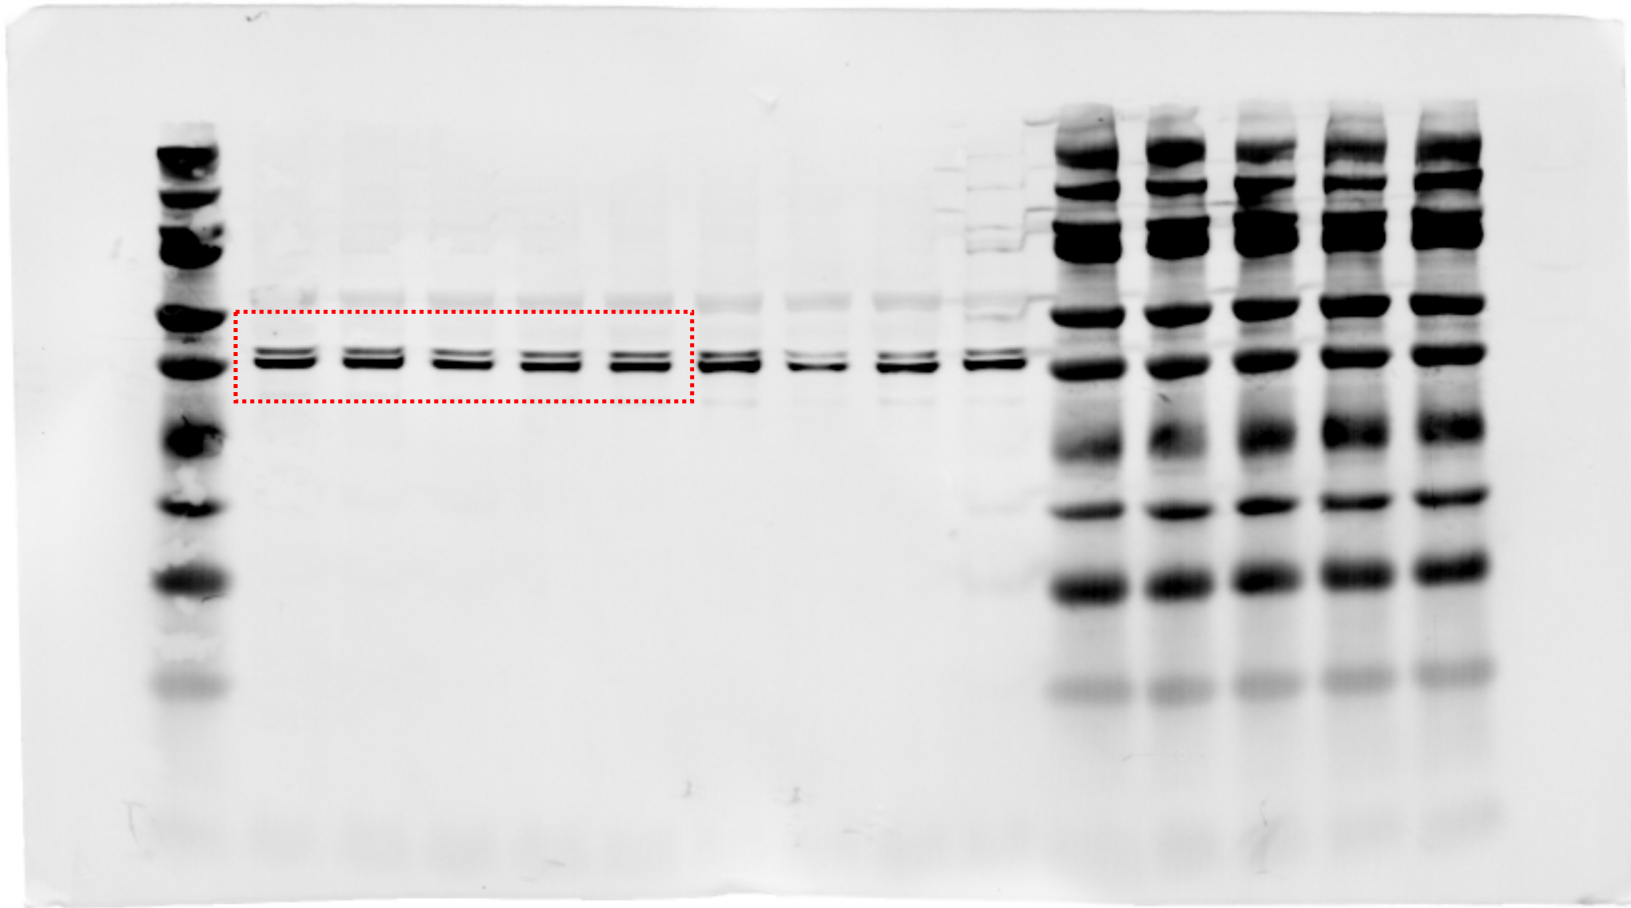

Supp Figure S1B: pERK  
Rabbit anti-phospho-ERK1/2 (D13.14.4E)  
Cell Signaling #4370

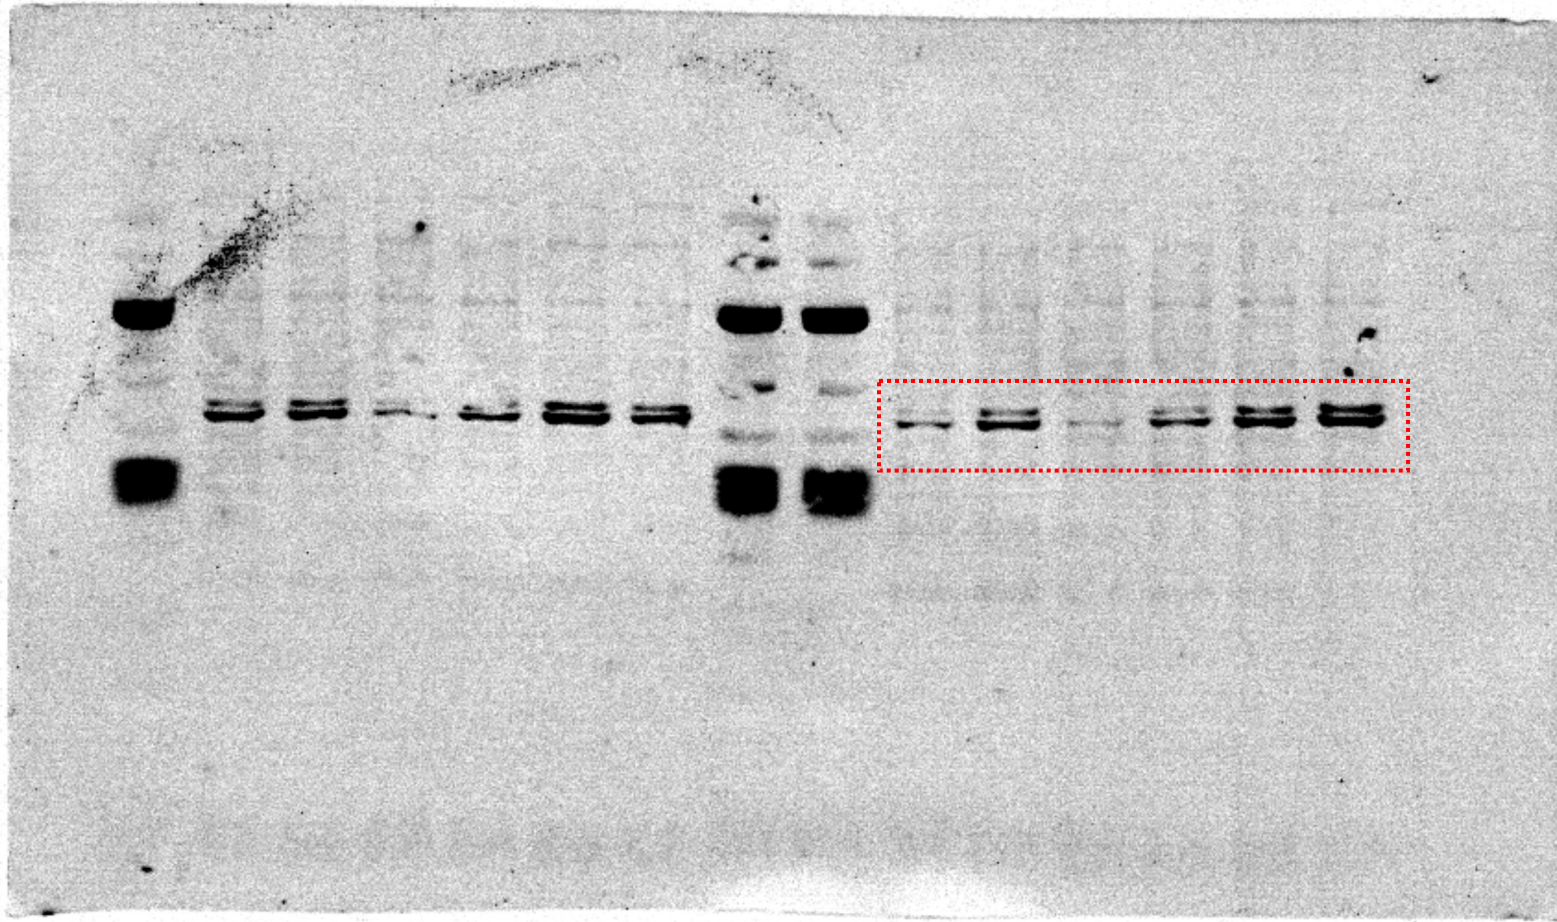



Supp Figure S1B: ERK  
Mouse anti-ERK1/2 (L34F12)  
Cell Signaling #4696

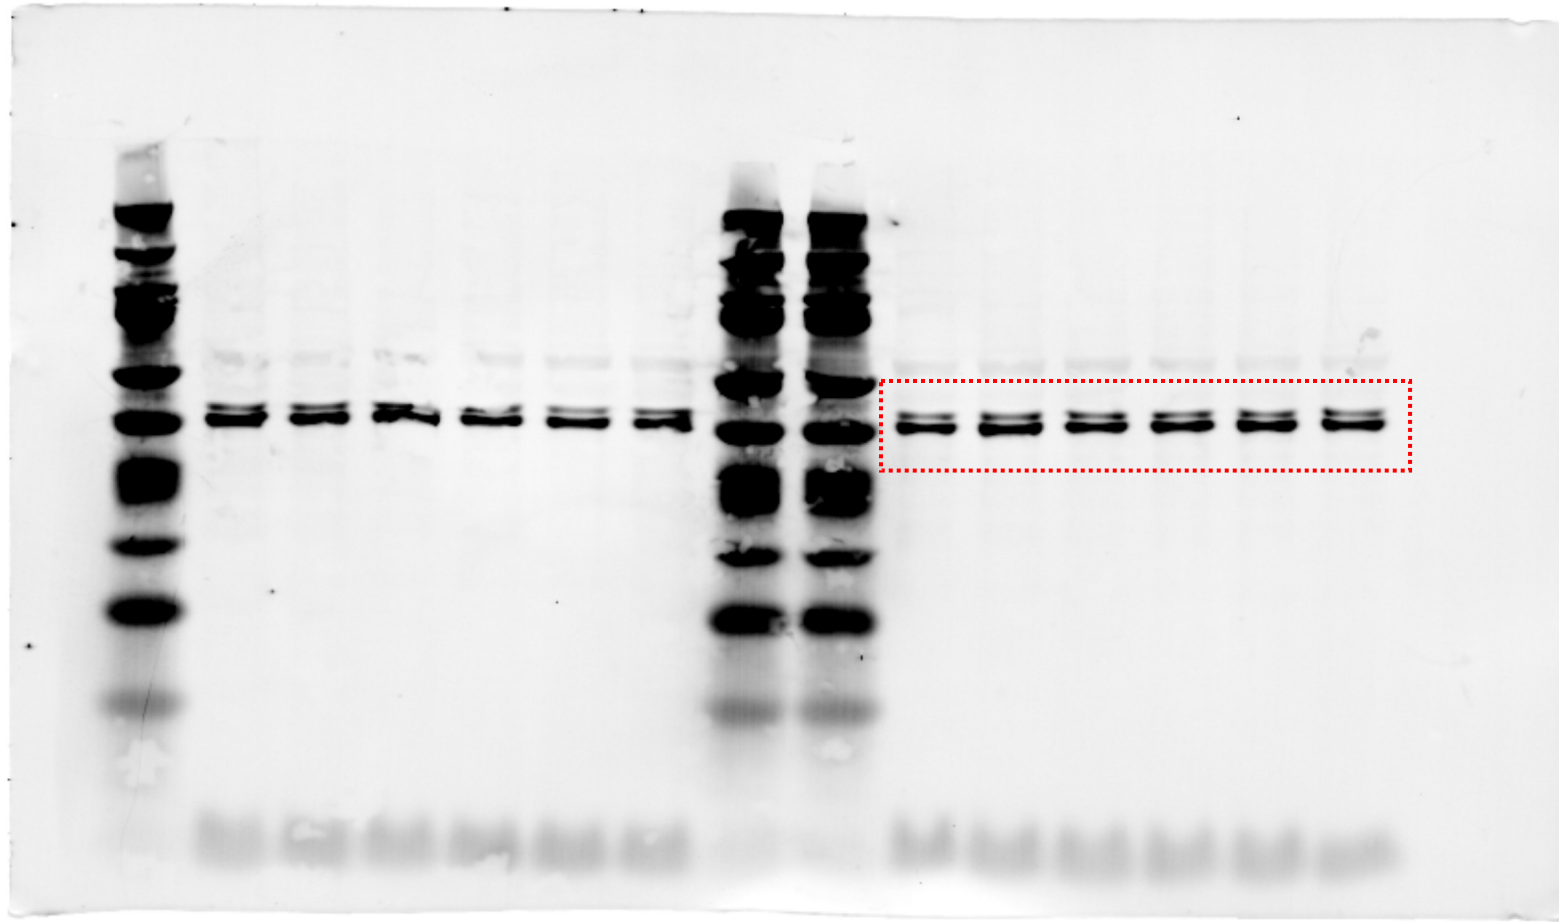

Supp Figure S2C: pERK  
Rabbit anti-phospho-ERK1/2 (D13.14.4E)  
Cell Signaling #4370

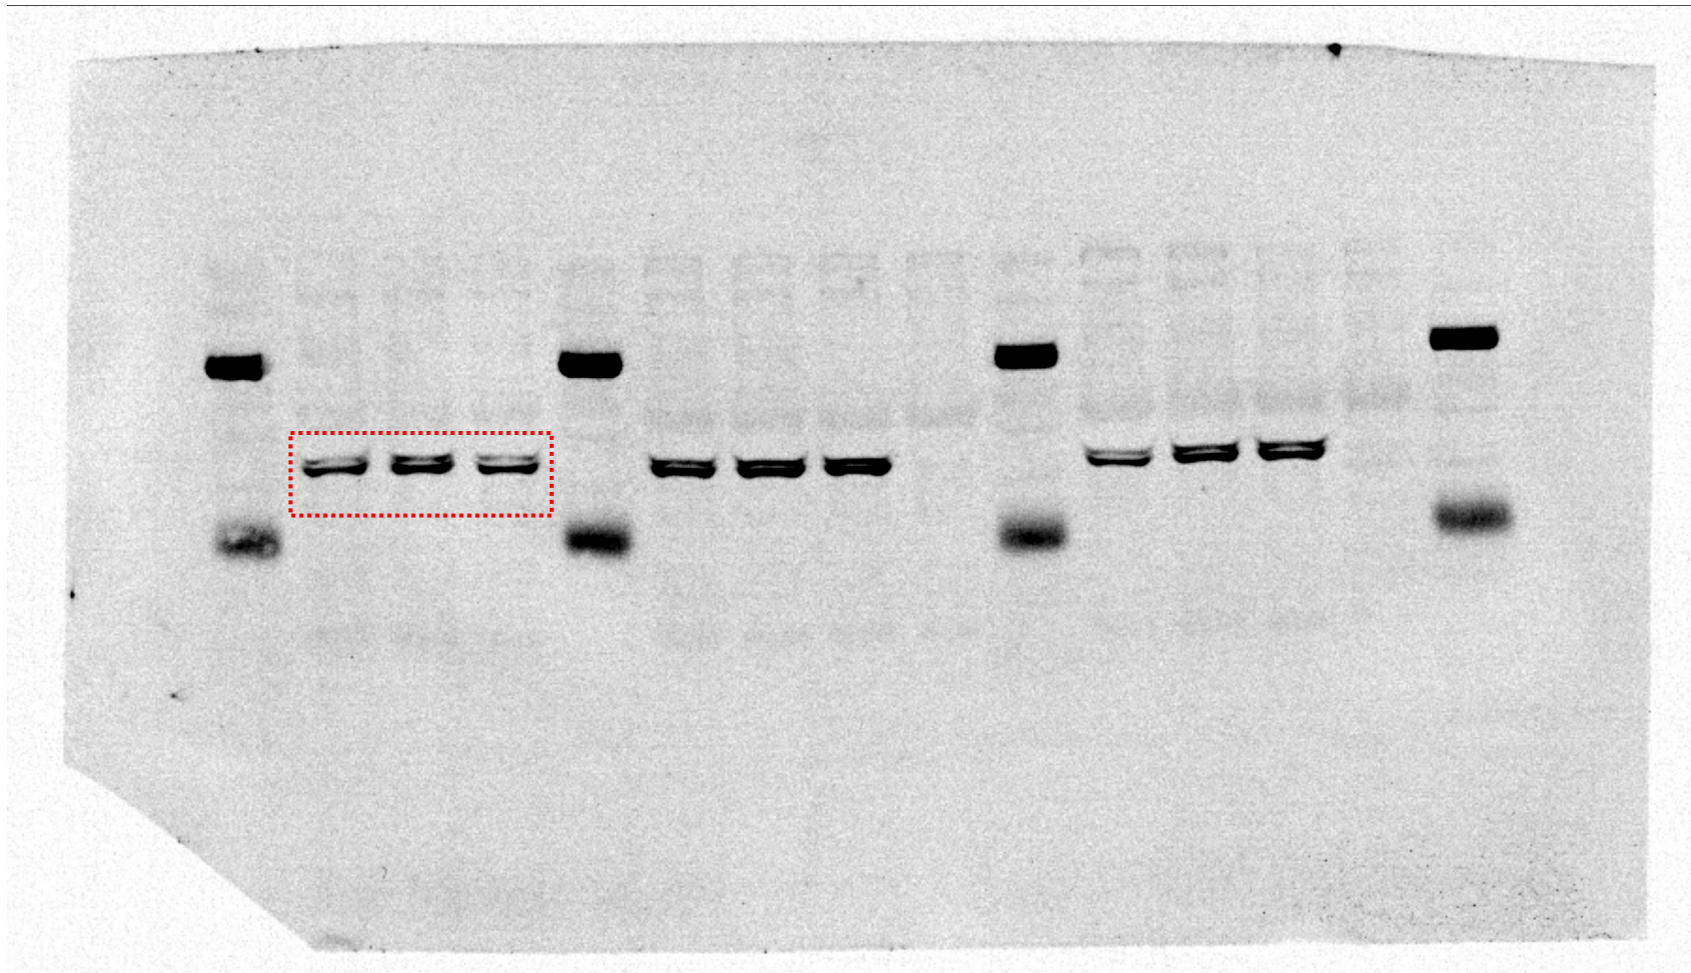

Supp Figure S2C: ERK  
Mouse anti-ERK1/2 (L34F12)  
Cell Signaling #4696

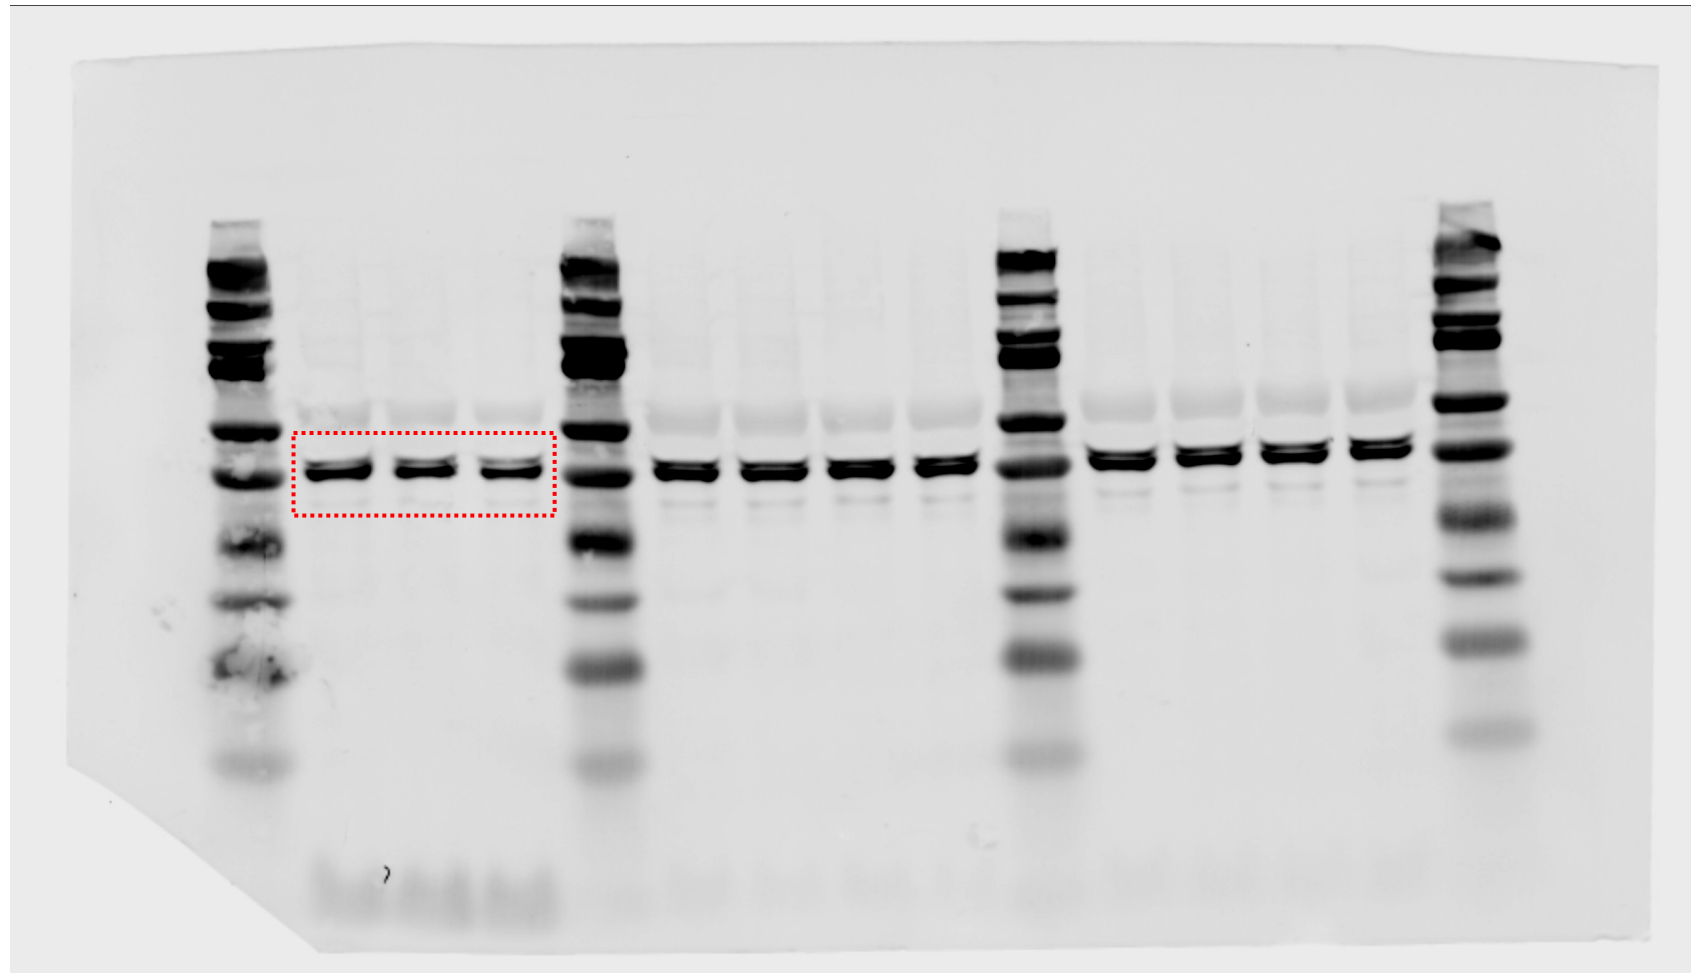

Supp Figure S2C: MEK  
Mouse anti-MEK1/2 (L38C12)  
Cell Signaling #4694

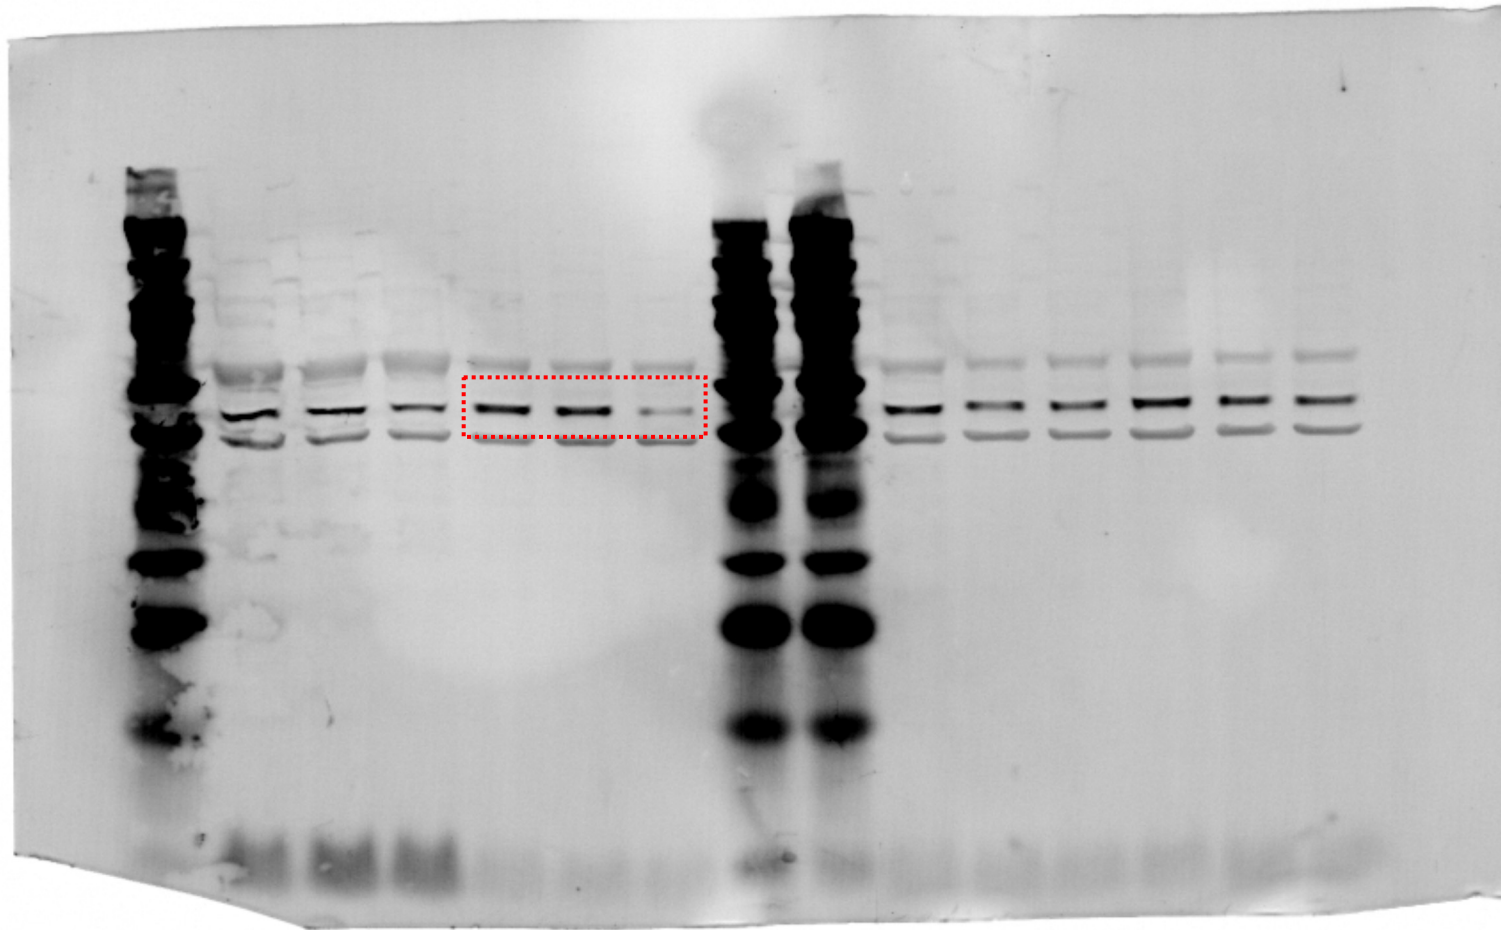

Supp Figure S2C: GAPDH  
Rabbit anti-GAPDH (D16H11)  
Cell Signaling #5174

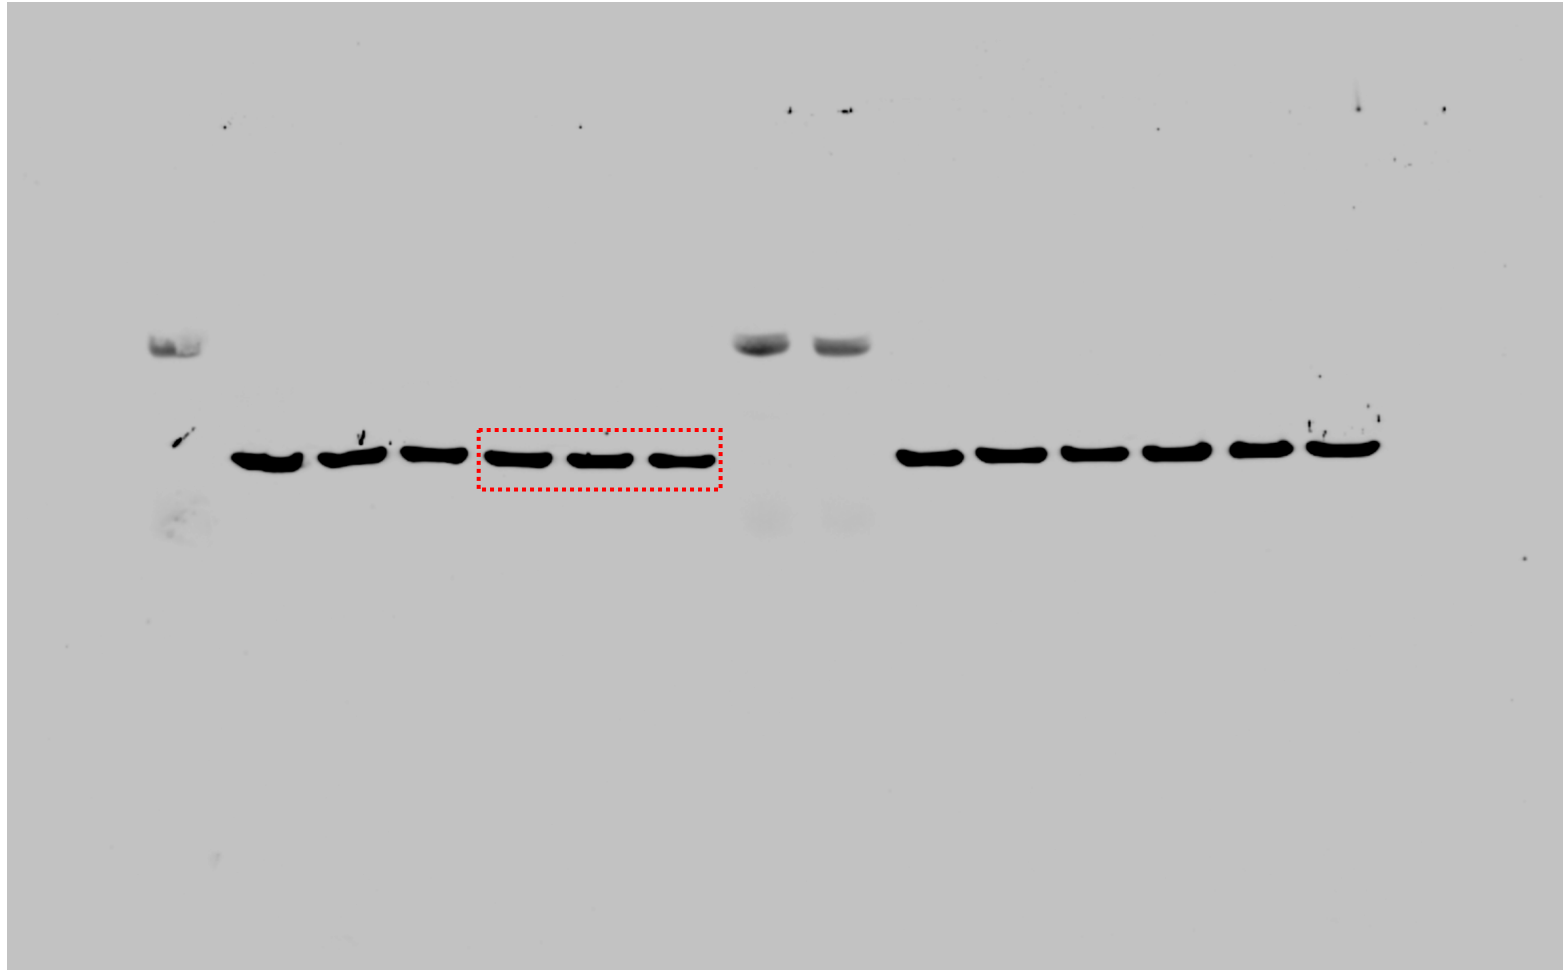

Supplement: sd2 [file 2]
